# Supplementary material for: Solar Drying of Sludge from a Steel-Wire-Drawing Industry
Source: MDPI journal article supplement (doi:10.3390/en16176314), 2023-08-30
Supplement: s1 [file s1]

Archive with 5 entries (5 files):
- Suplementary material A.pdf
- Suplementary material B.pdf
- Suplementary material C.pdf
- Suplementary material D.pdf
- Suplementary material E.pdf
