# Supplementary material for: Solar Drying of Sludge from a Steel-Wire-Drawing Industry
Source: MDPI journal article supplement (doi:10.3390/en16176314), 2023-08-30
Supplement: s1 [file s1 › Suplementary material A.pdf]

## Supplementary material file SA: Process performance modeling

### Solar drying of sludge from a steel wire drawing industry

*Lindomar Matias Goncalves<sup>ab</sup>, Clara Mendoza-Martinez<sup>bc</sup>, Elém Patrícia Alves Rocha<sup>c</sup>,  
Eduardo Coutinho de Paula<sup>b</sup>, Marcelo Cardoso<sup>b</sup>,*

<sup>a</sup>Federal University of Itajubá, Institute of Pure and Applied Sciences, Rua Irmã Ivone Drumond, 200 - Industrial District II, MG 35903-087 Itabira, Brazil.

<sup>bc</sup>LUT University, School of Energy Systems, Yliopistonkatu 34, FI-53850 Lappeenranta, Finland.

<sup>b</sup>Federal University of Minas Gerais, Department of environmental engineering, Av. Antônio Carlos 6627, MG 31270-901 Belo Horizonte, Brazil.

<sup>c</sup>Federal University of the Jequitinhonha and Mucuri Valleys, Department of Materials Engineering at the, Campus Janaúba, Av. Um 4050, University City, MG 39447-901, Janaúba, Brazil.

Table S1 shows the results of the Doehlert model of the at least two duplicate runs. The set of experimental design explain the effect of temperature and air velocity on solid yield. To study the reproducibility of the design points, the center point in the model has been repeated 5 times.

Table S1. Experimental design Doehlert

| Run | Factors                          |                                           | Response   |                    |
|-----|----------------------------------|-------------------------------------------|------------|--------------------|
|     | Variable X <sub>1</sub> (T [°C]) | Variable X <sub>2</sub> (Velocity [mp/s]) | Y (MY [%]) | $\hat{Y}$ (MY [%]) |
| 1   | 1 (66)                           | 0 (1.1)                                   | 58.4       | 60.9               |
| 2   | 0.5 (58.5)                       | 0.866 (1.2)                               | 61.5       | 59.0               |
| 3   | -1 (36)                          | 0 (1.1)                                   | 76.7       | 74.2               |
| 4   | -0.5 (43.5)                      | -0.866 (1)                                | 46.4       | 48.9               |
| 5   | 0.5 (58.5)                       | -0.866 (1)                                | 61.5       | 59.0               |
| 6   | -0.5 (43.5)                      | 0.866 (1.2)                               | 80.0       | 82.5               |
| 7   | 0 (51)                           | 0 (1.1)                                   | 66.3       | 68.2               |
| 8   | 0 (51)                           | 0 (1.1)                                   | 65.0       | 68.2               |
| 9   | 0 (51)                           | 0 (1.1)                                   | 71.2       | 68.2               |

|    |        |         |      |      |
|----|--------|---------|------|------|
| 10 | 0 (51) | 0 (1.1) | 70.0 | 68.2 |
| 11 | 0 (51) | 0 (1.1) | 68.4 | 68.2 |

Figure S1 Depicts the corresponding response of the Doehlert model applied to the drying system.

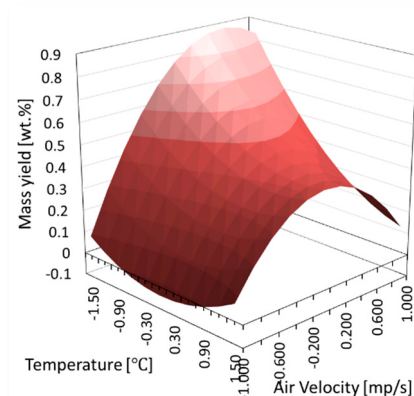

Figure S1. surface plot for the drying system based on a model with temperature and air velocity as input factor for drying yield as response.

Figure S2 displayed the residual and the normal probability plots.

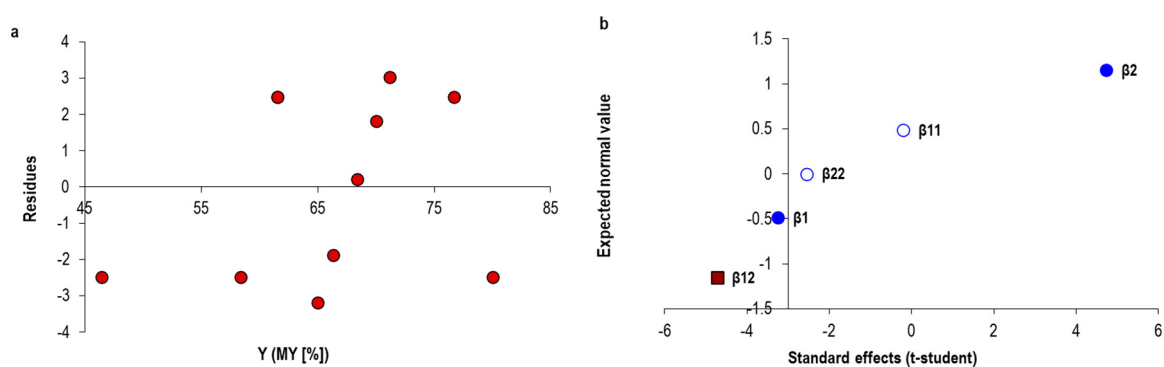

Figure S2. (a) residues plot and (b) normal probability plots of drying model.

Table S2 and S3 summarizes the respective terms and regression coefficients on solid yield based on analysis of variance (ANOVA) at  $\alpha=0.05$  and Table S3 shows the ANOVA

Table S2. Regression coefficient of the significant terms with respective p-value for the solid yield response.

|           | Coefficient           |        |   | error     | t(5)    | p-value |
|-----------|-----------------------|--------|---|-----------|---------|---------|
| <b>SG</b> | <b>b<sub>0</sub></b>  | 68.18  | ± | 1.5890836 | 42.9052 | 1E-07   |
| <b>SG</b> | <b>b<sub>1</sub></b>  | -6.667 | ± | 2.0514981 | 3.24966 | 0.0227  |
| <b>SG</b> | <b>b<sub>2</sub></b>  | 9.7    | ± | 2.0515583 | 4.728   | 0.0052  |
|           | <b>b<sub>11</sub></b> | -0.63  | ± | 2.9729032 | 0.21191 | 0.8405  |
|           | <b>b<sub>22</sub></b> | -7.564 | ± | 2.9730776 | 2.54409 | 0.0516  |
| <b>SG</b> | <b>b<sub>12</sub></b> | -19.4  | ± | 4.1031166 | 4.728   | 0.0052  |

Table S3. ANOVA – quadratic model for temperature and air velocity as representatives values of  $p=0.05$

|                            | Sum of Squares | DF | Mean Square | F-Value |           | P-Value |
|----------------------------|----------------|----|-------------|---------|-----------|---------|
| <b>Regression</b>          | 779.64         | 5  | 155.93      | 12.35   | <b>SG</b> | 0.008   |
| <b>Residuals</b>           | 63.13          | 5  | 12.626      |         |           |         |
| <b>F. Adjustment</b>       | 37.002         | 1  | 37.002      | 5.6647  |           | 0.076   |
| <b>Error</b>               | 26.128         | 4  | 6.532       |         |           |         |
| <b>Total</b>               | 842.77         | 10 |             |         |           |         |
| % variation explained      |                |    |             | 92.51   |           |         |
| % max. variation explained |                |    |             | 96.90   |           |         |
