# Supplementary material for: Solar Drying of Sludge from a Steel-Wire-Drawing Industry
Source: MDPI journal article supplement (doi:10.3390/en16176314), 2023-08-30
Supplement: s1 [file s1 › Suplementary material B.pdf]

## Supplementary material file SB: Elemental composition of steel wire sludge using X-ray diffraction analysis

### Solar drying of sludge from a steel wire drawing industry

*Lindomar Matias Goncalves<sup>ab</sup>, Clara Mendoza-Martinez<sup>bc</sup>, Elém Patricia Alves Rocha<sup>c</sup>, Eduardo Coutinho de Paula<sup>b</sup>, Marcelo Cardoso<sup>b</sup>,*

<sup>a</sup>Federal University of Itajubá, Institute of Pure and Applied Sciences, Rua Irmã Ivone Drumond, 200 - Industrial District II, MG 35903-087 Itabira, Brazil.

<sup>bc</sup>LUT University, School of Energy Systems, Yliopistonkatu 34, FI-53850 Lappeenranta, Finland.

<sup>b</sup>Federal University of Minas Gerais, Department of environmental engineering, Av. Antônio Carlos 6627, MG 31270-901 Belo Horizonte, Brazil.

<sup>c</sup>Federal University of the Jequitinhonha and Mucuri Valleys, Department of Materials Engineering at the, Campus Janaúba, Av. Um 4050, University City, MG 39447-901, Janaúba, Brazil.

Table S4. Elemental composition of steel wire sludge using X-ray diffraction analysis

| Essay          | Unit | Date     | LQ    | Reference Methodology | Result  | ABNT NBR No. 10.004 | U      |
|----------------|------|----------|-------|-----------------------|---------|---------------------|--------|
| Total Aluminum | mg/L | 06/02/21 | 0.1   | SMEWW - 3111          | < 0.1   | 0.2                 | N.A.   |
| total cadmium  | mg/L | 06/02/21 | 0.001 | SMEWW - 3111          | < 0.001 | 0.005               | N.A.   |
| total lead     | mg/L | 05/28/21 | 0.01  | SMEWW - 3111          | < 0.01  | 0.01                | N.A.   |
| total cyanide  | mg/L | 05/27/21 | 0.01  | SMEWW -4500-CN-E      | < 0.01  | 0.07                | N.A.   |
| Chloride       | mg/L | 05/26/21 | 0.5   | SMEWW -4500-Cl        | 3750.08 | 250                 | 99.377 |
| Copper         | mg/L | 05/28/21 | 0.05  | SMEWW - 3111          | < 0.05  | 2.0                 | N.A.   |
| Total Chrome   | mg/L | 06/08/21 | 0.05  | SMEWW - 3111          | < 0.05  | 0.05                | -      |

|                |       |          |            |                     |          |       |         |
|----------------|-------|----------|------------|---------------------|----------|-------|---------|
| Iron           | mg/L  | 06/08/21 | 0.05       | SMEWW - 3111        | < 0.05   | 0.3   | N.A.    |
| total fluoride | mg/L  | 05/25/21 | 1.0        | SMEWW - 4500F-C     | < 1,00   | 1,5   | N.A.    |
| phenol index   | mg/L  | 06/18/21 | 0,.003     | SMEWW - 5530 C      | < 0.003  | 0.01  | N.A.    |
| Manganese      | mg/L  | 06/04/21 | 0.05       | SMEWW - 3111        | < 0.05   | 0.1   | N.A.    |
| total mercury  | mg/L  | 06/03/21 | 0.000<br>2 | SMEWW - 3112        | < 0,0002 | 0,001 | N.A.    |
| Nitrate        | mgN/L | 05/21/21 | 0.05       | SMEWW - 4500-NO3-E  | 0.18     | 10    | 0.017   |
| pH             | -     | 05/21/21 | 0.1        | SMEWW - 4500H+B     | 8.1      | -     | 0.03    |
| full silver    | mg/L  | 05/25/21 | 0.05       | SMEWW - 3111        | < 0.050  | 0.05  | N.A.    |
| Sodium         | mg/L  | 06/01/21 | 0.05       | SMEWW - 3111        | 28.60    | 200   | 2.031   |
| total sulfate  | mg/L  | 06/21/21 | 1.0        | SMEWW - 4500-SO42-E | 8037.70  | 250   | 433.232 |
| Surfactants    | mg/L  | 05/21/21 | 0.1        | SMEWW - 5540 C      | < 0.10   | 0.5   | N.A.    |
| total zinc     | mg/L  | 06/04/21 | 0.05       | SMEWW - 3111        | < 0.05   | 5     | N.A.    |
