# Supplementary material for: Solar Drying of Sludge from a Steel-Wire-Drawing Industry
Source: MDPI journal article supplement (doi:10.3390/en16176314), 2023-08-30
Supplement: s1 [file s1 › Suplementary material C.pdf]

## Supplementary material file SC: Details of the development of the solar dryer

### Solar drying of sludge from a steel wire drawing industry

*Lindomar Matias Goncalves<sup>ab</sup>, Clara Mendoza-Martinez<sup>bc</sup>, Elém Patricia Alves Rocha<sup>c</sup>, Eduardo Coutinho de Paula<sup>b</sup>, Marcelo Cardoso<sup>b</sup>,*

<sup>a</sup>Federal University of Itajubá, Institute of Pure and Applied Sciences, Rua Irmã Ivone Drumond, 200 - Industrial District II, MG 35903-087 Itabira, Brazil.

<sup>bc</sup>LUT University, School of Energy Systems, Yliopistonkatu 34, FI-53850 Lappeenranta, Finland.

<sup>b</sup>Federal University of Minas Gerais, Department of environmental engineering, Av. Antônio Carlos 6627, MG 31270-901 Belo Horizonte, Brazil.

<sup>c</sup>Federal University of the Jequitinhonha and Mucuri Valleys, Department of Materials Engineering at the, Campus Janaúba, Av. Um 4050, University City, MG 39447-901, Janaúba, Brazil.

The sensors used in the experimental drier prototype and details of the development stage of the solar dryer prototype are shown in Table S5 and Figure S3, respectively.

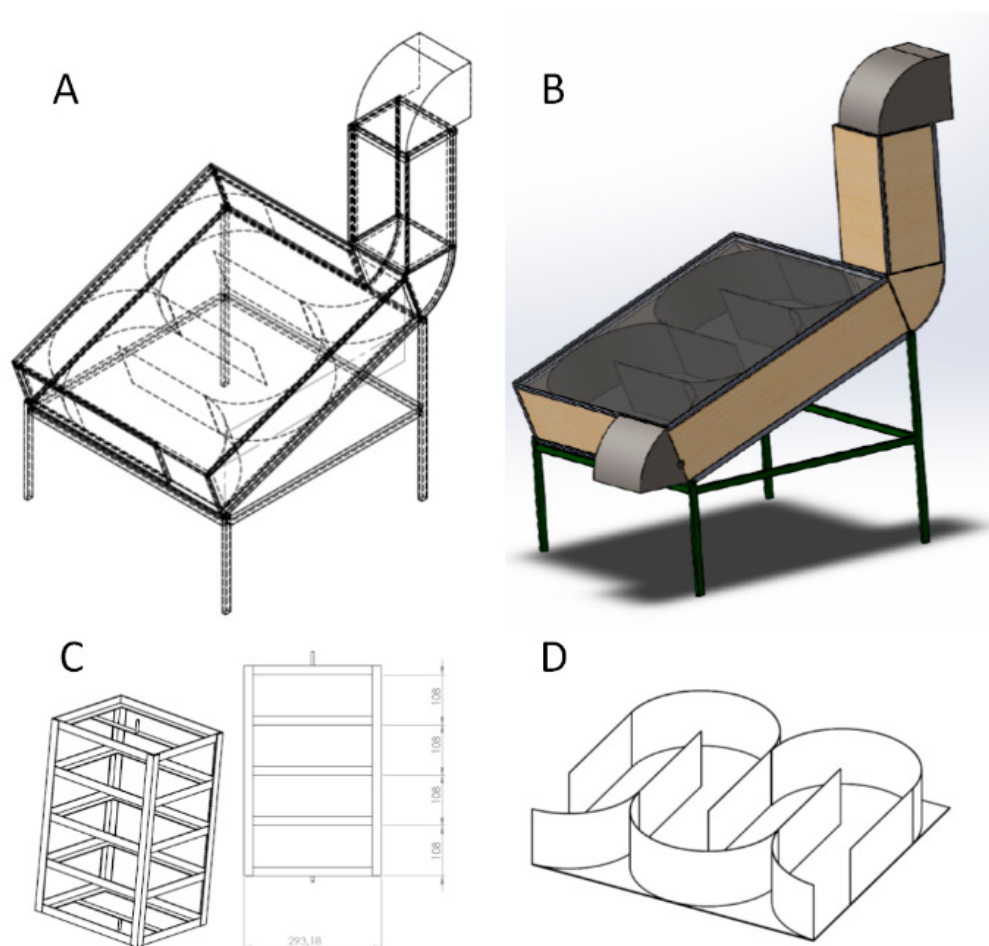

Figure S3. Drawing of solar dryer parts. (A) schematic design of the dryer, (B) drawing of the dryer in view, (C) drying basket, (D) baffle channel.

Table S5. Instrumentation used in the solar dryer.

| Sensor                                                                                                          | Use                                                                                               | Sensor features                                                                             |
|-----------------------------------------------------------------------------------------------------------------|---------------------------------------------------------------------------------------------------|---------------------------------------------------------------------------------------------|
| 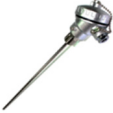<br>PT-100 temperature sensor  | Measure the temperature at various points in the dryer                                            | Made of platinum, with resistance nominal 100 ohms at 0°C                                   |
| 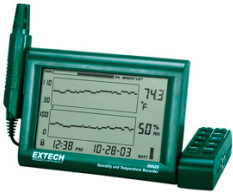<br>Thermal hygrometer         | Graphic Recorder for Temperature + Humidity measurement and Set Point condensation. Extech RH520A | The RH520A's Internal Memory can store up to 49,152 measurements for later transfer to a PC |
| 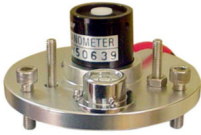<br>Pyranometer                | Used for measurements of the global solar radiation incident on the equipment plane.              | Weather resistant silicone sensor cosine correction. Low cost.                              |
| 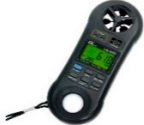<br>multifunction anemometer | To measure the air velocity at the inlet of the equipment.                                        | High measurement accuracy. Measure luminosity, temperature and relative humidity.           |
| 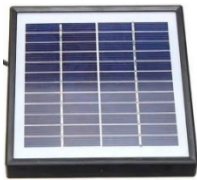<br>Shelter                  | The Mini Solar Panel 12V 150mA is used to generate energy for the solar dryer fan.                | Solar Panel, Multifunction Solar Panel 12v Waterproof, Dura.                                |
