# Supplementary material for: Solar Drying of Sludge from a Steel-Wire-Drawing Industry
Source: MDPI journal article supplement (doi:10.3390/en16176314), 2023-08-30
Supplement: s1 [file s1 › Suplementary material D.pdf]

## Supplementary material file SD: Elements detected in steel wire sludge structure

### Solar drying of sludge from a steel wire drawing industry

*Lindomar Matias Goncalves<sup>ab</sup>, Clara Mendoza-Martinez<sup>bc</sup>, Elém Patricia Alves Rocha<sup>c</sup>, Eduardo Coutinho de Paula<sup>b</sup>, Marcelo Cardoso<sup>b</sup>,*

<sup>a</sup>Federal University of Itajubá, Institute of Pure and Applied Sciences, Rua Irmã Ivone Drumond, 200 - Industrial District II, MG 35903-087 Itabira, Brazil.

<sup>bc</sup>LUT University, School of Energy Systems, Yliopistonkatu 34, FI-53850 Lappeenranta, Finland.

<sup>b</sup>Federal University of Minas Gerais, Department of environmental engineering, Av. Antônio Carlos 6627, MG 31270-901 Belo Horizonte, Brazil.

<sup>c</sup>Federal University of the Jequitinhonha and Mucuri Valleys, Department of Materials Engineering at the, Campus Janaúba, Av. Um 4050, University City, MG 39447-901, Janaúba, Brazil.

Table S6. Elements detected in steel wire sludge structure.

| Element  | Series   | unn. C[wt.%] | norm. C[wt.%] | Atom. C[at.%] | Error (1Sigma)[wt.%] |
|----------|----------|--------------|---------------|---------------|----------------------|
| Carbon   | K-series | 13.11        | 12.29         | 20.64         | 2.40                 |
| Oxygen   | K-series | 46.45        | 43.53         | 54.88         | 5.39                 |
| Sulfur   | K-series | 18.08        | 16.94         | 10.66         | 0.67                 |
| Chlorine | K-series | 1.07         | 1.00          | 0.57          | 0.06                 |
| Calcium  | K-series | 26.35        | 24.69         | 12.43         | 0.79                 |
| Iron     | K-series | 1.08         | 1.01          | 0.37          | 0.06                 |
| Sodium   | K-series | 0.51         | 0.47          | 0.42          | 0.06                 |
| Silicon  | K-series | 0.06         | 0.06          | 0.04          | 0.03                 |
| Total:   |          | 106.70       | 100.00        | 100.00        |                      |
