# Supplementary material for: Solar Drying of Sludge from a Steel-Wire-Drawing Industry
Source: MDPI journal article supplement (doi:10.3390/en16176314), 2023-08-30
Supplement: s1 [file s1 › Suplementary material E.pdf]

## Supplementary material file SE: Details of the CFD simulation stage of the solar dryer prototype

### Solar drying of sludge from a steel wire drawing industry

*Lindomar Matias Goncalves<sup>ab</sup>, Clara Mendoza-Martinez<sup>bc</sup>, Elém Patricia Alves Rocha<sup>c</sup>, Eduardo Coutinho de Paula<sup>b</sup>,  
Marcelo Cardoso<sup>b</sup>,*

<sup>a</sup>Federal University of Itajubá, Institute of Pure and Applied Sciences, Rua Irmã Ivone Drumond, 200 - Industrial District II, MG 35903-087 Itabira, Brazil.

<sup>b</sup>LUT University, School of Energy Systems, Yliopistonkatu 34, FI-53850 Lappeenranta, Finland.

<sup>b</sup>Federal University of Minas Gerais, Department of environmental engineering, Av. Antônio Carlos 6627, MG 31270-901 Belo Horizonte, Brazil.

<sup>c</sup>Federal University of the Jequitinhonha and Mucuri Valleys, Department of Materials Engineering at the, Campus Janaúba, Av. Um 4050, University City, MG 39447-901, Janaúba, Brazil.

Figure S4, describe the CFD simulation geometric arrangements and dimension description carried out.

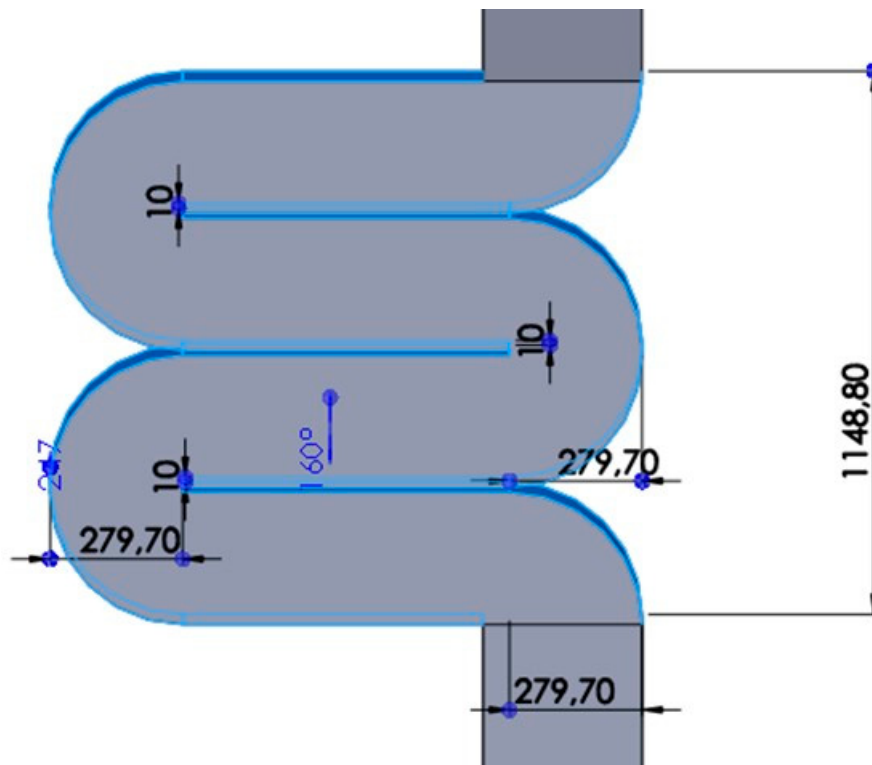

Figure S4. CFD simulation operation description

## Mesh

Overall Mesh Size: 25mm

Wall mesh: 7.5 mm divided into 7 layers with a growth rate of 1.2.

Total elements for mesh without baffles: 588,254

Total elements for the mesh with 90° deflectors: 596,742

Total elements for the mesh with 180° deflectors: 603,116

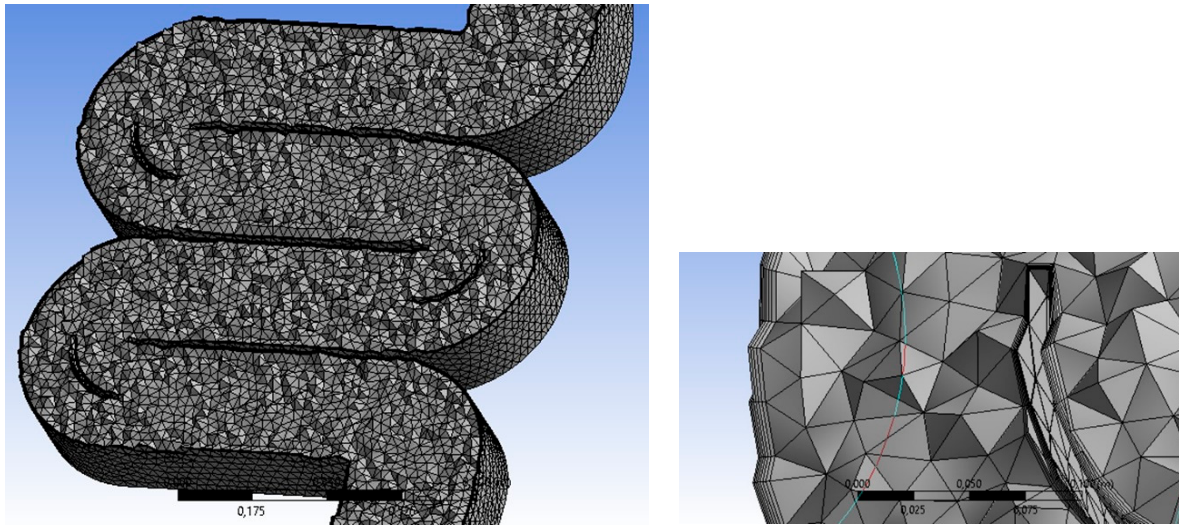

Figure S5. Mesh used in CFD simulation.

Table S7 shows the parameter description o the boundary conditions of the CFD simulation.

Table S7. Boundary conditions

| Domain               |                                     | Contour     |                                |
|----------------------|-------------------------------------|-------------|--------------------------------|
| Material             | Air ( $\rho = 1,2 \text{ kg/m}^3$ ) | Inlet       | 0,0069 kg/s                    |
| Pressure ref.        | 1 atm                               |             | 25 °C                          |
| Gravity              | (0,0; -9,81; 0,0)                   | Outlet      | 0,0069 kg/s                    |
| Flow                 | Laminar                             | Bottom      | Adiabatic wall                 |
| Radiation model      | Discrete Transfer                   |             | Emissivity: 0,95               |
|                      | 18 rays                             |             | Diffusion: 0,05                |
|                      | Gray                                | Lateral     | Adiabatic wall                 |
| Isotropic scattering |                                     |             | Emissivity: 0,7                |
|                      |                                     |             | Diffusion: 0,3                 |
| Numerical criteria   |                                     | Glass       | 1) wall 66,2 °C                |
| Convergence          | $10^{-4}$                           |             | 2) wall 713,1 W/m <sup>2</sup> |
| Iterations           | 600                                 |             | Emissivity: 1,0                |
|                      |                                     |             | Diffusion: 1,0                 |
|                      |                                     | Other walls | Adiabatic 100%                 |
